# Supplementary material
Source: Research Square preprint supplement (doi:10.21203/rs.3.rs-9567535/v1)
Supplement: Supplementary file 1 [file e5ffda1f0767d5f28a632ded.docx]

**Annex 1: Value Typology Classification**

Step 1 of the analysis (value-typology mapping). Using structured interpretive coding, UK and Mexican water instruments are analysed (UK: Water Environment (Water Framework Directive) Regulations 2017 (WFD Regulations) and Environment Act 2021 (EA 2021); Mexico: Ley de Aguas Nacionales (LAN) and Ley General de Aguas (LGA)) and provisions in which a water value orientation is adequately explicit legible in law are identified. Each provision is assigned to the dominant IPBES Life Framework value type it most strongly operationalises (living *from*, *in*, *with*, or *as* nature), based on its primary legal effect. Each provision is accompanied by a short factual description and a brief justification for the classification. The annex provides the full list underpinning Figure 1 and the results narrative, showing which value orientations are most prevalent and which are limited or absent.

**Living from nature**

| **Legal Instrument** | **Legal Provision** | **Short factual description** | **Justification for classification within the typology** |
| --- | --- | --- | --- |
| **United Kingdom** | | | |
| WFD 2017 | Reg. 2(1) | Defines water services including abstraction and treatment for economic activity. | Defines water management as the provision of utility services for human and economic consumption. |
| WFD 2017 | Reg. 7(1); 21(1)(b) | Mandates economic analysis and cost recovery for industry and agriculture water services. | Embodies the financial principle of recovering costs and applies utilitarian analysis to resource use. |
| WFD 2017 | Reg. 8(1)(a) | Identifies protected areas based on volume abstracted for human consumption. | Measures the importance of water bodies based on quantifiable human consumption and service metrics. |
| WFD 2017 | Reg. 9(2); 10(2)(b)(i) | Designates shellfish waters to protect economically significant production. | Designates protected areas based on the commercial value of the species they support. |
| WFD 2017 | Reg. 15(3)(a)(iii)-(iv) | Permits modifications for power generation, irrigation, and flood protection. | Lists high-value utilitarian uses and economic activities that take precedence over some ecological goals. |
| WFD 2017 | Reg. 20(2)(c); 21(1)(a) | Requires measures and pricing policies to incentivise efficient water use. | Mandates economic policy mechanisms designed to increase overall resource efficiency. |
| WFD 2017 | Reg. 20(2)(e) | Requires measures to control freshwater abstraction via registers and authorisations. | Regulates the extraction and infrastructure necessary for resource exploitation. |
| WFD 2017 | Reg. 20(2)(j)(i) | Authorises water injection for mining or hydrocarbon exploration. | Allows specific discharges related to industrial extraction operations necessary for economic production. |
| EA 2021 | Sec. 1(3)(d) | Sets resource efficiency and waste reduction as priority areas for environmental targets. | Establishes resource efficiency as a primary utilitarian goal in environmental governance. |
| EA 2021 | Sec. 78(2); (5); (7) | Amends WIA 1991 to require Water Resources Management and Drought Plans. | Mandates mandatory planning processes and cycles for service providers and utilities. |
| EA 2021 | Sec. 78(7) (Insert 39F(2)) | Requires water supply licensees to share information to support service efficiency. | Establishes procedural requirements to ensure optimal coordination and efficiency in supply networks. |
| EA 2021 | Sec. 79 (Insert 94A) | Requires sewerage undertakers to prepare Drainage and Sewerage Management Plans. | Requires mandatory planning procedures essential for the management and continuity of infrastructure. |
| EA 2021 | Sec. 88 (Insert 61ZA(3); 61ZB(3)) | No compensation for revoking licenses if under 75% of the volume is used. | Links financial rights directly to the title holder's demonstrated efficiency in resource utilisation. |
| EA 2021 | Sec. 94 & 95 | Provides powers for regulations concerning land valuation for drainage rates. | Allocates powers to regulatory bodies to set financial rules for cost recovery. |
| EA 2021 | Sec. 97 | Provides for the disclosure of HMRC information for land drainage rate calculation. | Facilitates the administrative processes required to calculate and collect infrastructure fees. |
| EA 2021 | Sec. 101(1); (5) | Authorises the creation of biodiversity credits for meeting compliance goals. | Creates an economic market mechanism for achieving environmental targets through transactional exchange. |
| **Mexico** | | | |
| LGA | Art. 27, III | Regulates the provision of water services, treatment, and wastewater reuse. | It treats water as a resource for service provision, economic activity, and reuse. |
| LGA | Art. 44 | Defines the functions of water operators, including extraction, billing, and fee collection. | It primarily treats water as a resource for human use, economic activity, and cost recovery. |
| LAN | Art. 1 | Regulates the exploitation and distribution of water for national development. | Primarily treats water as a resource for human use and economic activity. |
| LAN | Art. 3, VIII / XIII | Defines legal titles (rights consisting of assignments and concessions) for water extraction. | Establishes the legal instruments required for the allocation and extraction of resources for human purposes. |
| LAN | Art. 3, XVIII | Defines a fee mechanism to recover costs for infrastructure and investments. | Introduces pricing and cost recovery mechanisms for utility management. |
| LAN | Art. 3, LVII | Defines aquaculture use for commercial, ornamental, or recreational purposes. | Dominant framing is commercial exploitation, though it includes recreational aspects (mixed). |
| LAN | Art. 14 BIS 5, XI | Mandates that environmental services provided by water must be paid for. | Frames environmental protection as a quantifiable economic service for financial sustainability. |
| LAN | Art. 14 BIS 5, XV / XVI | Mandates financial sustainability and "user-pays" principle for water management. | Implements pricing, cost recovery, and financial sustainability mechanisms. |

**Living in nature**

| **Instrument** | **Provision** | **Short factual description** | **Justification** |
| --- | --- | --- | --- |
| **United Kingdom** | | | |
| WFD 2017 | Reg. 10(2)(b)(ii) | Register of protected areas must include bodies designated as recreational waters. | Identifies areas set aside for public enjoyment and social interaction with the water environment. |
| WFD 2017 | Sch. 1, para. 1(2) | Defines pollution as including substances that impair or interfere with amenities. | Directly protects the social value of water by preventing interference with public enjoyment. |
| WFD 2017 | Sch. 5, para 13(a)(i) | Refers to legislation concerning the management of bathing water quality. | Ensures water quality for safe human recreational interaction and health-related use. |
| EA 2021 | Sec. 1(1)(b) | Empowers the Secretary of State to set targets for the enjoyment of the natural environment. | Institutionalises the objective of protecting non-market, experiential, and amenity values. |
| EA 2021 | Sec. 57(3)(b) & 58(1) [WIA 1991] | Requires the reduction of adverse impacts from sewage on public health. | Imposes a clear duty to ensure safe water use for public health and community benefit. |
| EA 2021 | Sec. 81 (Insert 141DA) | Requires sewerage undertakers to publish real-time storm overflow discharge information. | Mandates transparency to inform the public about amenity safety and recreational use. |
| EA 2021 | Sec. 125(1)(b) | Defines conservation purpose to include conserving cultural or historic land. | Allows for the protection of landscapes based on non-market social values like heritage. |
| **Mexico** | | | |
| LGA | Art. 1 | Regulates the human right to water for personal and domestic consumption. | It prioritises water’s role in human well-being and health through the framework of a human right. |
| LGA | Art. 3, V | Mandates equitable access to public water and sanitation services. | It mandates equitable access, framing water primarily as a basic service for human well-being. |
| LGA | Art. 4, V | Defines the human right to water in terms of safety, health, and affordability. | It frames water protection in terms of human health and safety rather than ecosystem functioning. |
| LGA | Art. 7, IV | Defines affordability as ensuring costs do not undermine other rights. | It defines “asequibilidad” as ensuring water costs do not undermine other rights, centred on dignity. |
| LGA | Art. 9, Para 2 | Requires provision of a minimum quantity of water for human survival. | It prioritises water for fundamental human survival and health over economic considerations. |
| LGA | Art. 13 | Mandates health measures to prevent and control waterborne diseases. | It protects water primarily to reduce health risks and preserve human safety. |
| LGA | Art. 15, VI | Guarantees access to water specifically for menstrual dignity and health. | It recognises the role of water in social well-being, dignity, and quality of life for specific groups. |
| LGA | Art. 34 | Promotes rainwater harvesting specifically for household use and regional needs. | It promotes rainwater harvesting explicitly “para uso doméstico,” prioritising household access and lived well-being. |
| LGA | Art. 41 | Limits community water systems to non-profit personal and domestic use. | It limits community systems to “uso personal y doméstico, sin fines de lucro,” embedding water in social provisioning. |
| LAN | Art. 3, LVI | Defines domestic use for personal, household, and non-lucrative garden needs. | Regulates water distribution for human household consumption, human well-being, and lived experience. |
| LAN | Art. 4, Paragraph 2 | Prioritises water allocation for human consumption over all other uses. | Frames water protection primarily in terms of human survival and fundamental well-being. |
| LAN | Art. 14 BIS 5, XX | Mandates environmental education to foster responsible social participation. | Addresses cultural relationships and social values regarding human-water interactions. |
| LAN | Art. 84 BIS | Mandates the promotion of a water culture reflecting national reality. | Recognises the role of water in cultural identity and social experience. |

**Living with nature**

| **Instrument** | **Provision** | **Short factual description** | **Justification** |
| --- | --- | --- | --- |
| **United Kingdom** | | | |
| WFD 2017 | Reg. 3(2)(a) | Requires authorities to prevent deterioration of surface or groundwater status. | Establishes the fundamental non-deterioration mandate necessary for maintaining ecosystem health. |
| WFD 2017 | Reg. 13(2)(a) | Sets objectives to protect and restore surface water for ecological/chemical status. | Mandates the achievement of defined ecological standards and overall water system health. |
| WFD 2017 | Reg. 13(4) | Sets objectives to protect and restore groundwater for chemical/quantitative status. | Mandates the hydrological balance and chemical quality necessary for subsurface ecosystem health. |
| WFD 2017 | Reg. 20(2)(i) | Ensures hydromorphological conditions are consistent with achieving ecological status. | Focuses on the physical integrity and flow regimes necessary to support healthy aquatic ecosystems. |
| WFD 2017 | Sch. 1, Def "Ecological Status" | Defines status as the quality of the structure and functioning of aquatic ecosystems. | Provides the core measure for assessing biological health and ecosystem functionality. |
| WFD 2017 | Sch. 1, Def "Pollution" | Defines pollution as substances harmful to aquatic or dependent terrestrial ecosystems. | Recognises ecological interdependence by requiring protection of dependent ecosystems from pollution. |
| EA 2021 | Sec. 1(3)(c) | Establishes biodiversity as a priority area for long-term targets. | Sets a mandatory standard concerning the conservation and enhancement of biodiversity. |
| EA 2021 | Sec. 17(5) | Mandates the integration of environmental principles like precaution and prevention. | Codifies core duties requiring policy to actively prevent environmental damage and protect integrity. |
| EA 2021 | Sec. 44 | Defines "natural environment" including plants, animals, habitats, and natural systems. | Provides the core legal basis for considering and protecting interconnected ecological systems. |
| EA 2021 | Sec. 45(c) | Defines environmental protection including maintenance, restoration, or enhancement of nature. | Explicitly mandates active ecological restoration and enhancement. |
| EA 2021 | Sec. 61ZA(1) | Permits revocation of abstraction licenses to protect or improve the water environment. | Prioritises the health and protection of the water ecosystem over established abstraction rights. |
| EA 2021 | Sec. 67(4) | Defines "water environment" to include inland waters and associated flora/fauna. | Recognises the interdependence between water resources and the specific biodiversity that relies on them. |
| EA 2021 | Sec. 82 (Insert 141DB) | Requires continuous water quality monitoring upstream and downstream of storm overflows. | Requires continuous monitoring procedures designed to track the physical and chemical condition of water. |
| EA 2021 | Sec. 83 (Insert 141DC) | Requires sewerage undertakers to secure a progressive reduction in storm overflow impacts. | Imposes a continuous, mandatory duty on service providers to ensure ongoing ecological stewardship. |
| EA 2021 | Sec. 89(1) | Gives power to specify standards for the chemical status of water. | Allocates the power and mandate to a governing body to set mandatory ecological standards. |
| EA 2021 | Sec. 90 | Grants Welsh Ministers powers to regulate and set standards for water quality. | Allocates institutional authority to regulate water quality specifically for ecological integrity. |
| EA 2021 | Sec. 91 | Grants Northern Ireland Department powers to regulate and set standards for water quality. | Allocates institutional authority to regulate water quality specifically for ecological integrity. |
| EA 2021 | Sec. 93 | Interpretation section defining key water terms by reference to WFD. | Provides the legal definitions and standards necessary for ecological compliance and enforcement. |
| **Mexico** | | | |
| LGA | Art. 4, XVI | Defines nature-based solutions for restoration and conservation of ecosystems. | It recognises water bodies as ecological systems whose integrity and recovery must be maintained. |
| LGA | Art. 6, V | Defines prevention as measures to avoid environmental damage to water. | The core purpose is ecological stewardship and the avoidance of harm to the natural environment. |
| LGA | Art. 6, VI | Mandates precautionary measures to prevent irreversible degradation of water. | It allows regulatory intervention to prevent ecological harm and safeguard water status. |
| LGA | Art. 6, VIII | Defines sustainability as protection and restoration for present and future access. | It establishes ecocentric objectives, such as restoration and conservation, as the primary operational mechanisms. |
| LGA | Art. 23 | Mandates promotion of nature-based solutions for ecological restoration of basins. | It focuses on maintaining ecological integrity and the recovery of basin ecosystems. |
| LGA | Art. 25, II | Grants power for actions regarding remediation and protection of ecosystems. | It establishes ecological objectives centered on the integrity and recovery of natural water systems. |
| LGA | Art. 31, XIV | National Strategy includes actions for ecosystems that sustain water generation. | It defines water protection as a matter of ecosystem health and functioning. |
| LGA | Art. 35, c) | Sets an objective to prevent deterioration and restore the status of water bodies. | It establishes non-deterioration and restoration as explicit ecological objectives. |
| LGA | Art. 36, VIII | Promotes understanding of ecosystem damage on present and future water availability. | It recognises the dependence of water on ecosystem health and ecological status. |
| LAN | Art. 3, LIV | Defines the minimum ecological flow required to maintain ecological balance. | Recognises water bodies as ecological systems whose integrity must be maintained. |
| LAN | Art. 7, V | Declares restoration of vital water-linked ecosystems as public utility. | Focuses on the recovery and integrity of ecological systems independently of human use. |
| LAN | Art. 14 BIS 5, X | Establishes interdependence between water and broader ecological components. | Recognises the interdependence and integrity of natural systems as a governance principle. |
| LAN | Art. 29 BIS, III | Imposes duty on assignees to remedy environmental damage from discharges. | Requires regulatory intervention to remedy ecological harm and maintain ecosystem health. |
| LAN | Art. 123 BIS 4 | Sanctions unauthorised flow alterations that endanger persons or vital ecosystems. | Prohibits actions that compromise ecological integrity, systemic health, and human safety (mixed). |

**Living as nature**

None identified. The sources do not contain provisions explicitly recognising water bodies or nature as subjects of rights, legal persons, or entities with sacred/kinship status.
