# Supplementary material
Source: Research Square preprint supplement (doi:10.21203/rs.3.rs-9567535/v1)
Supplement: Supplementary file 2 [file f07896436359c96d54ac842e.docx]

**Annex 2: Legal-Feasibility Categorisation**

Step 2: legal-feasibility analysis. Coded provisions identified in Step 1 are classified into three legal functions that capture the minimum legal viability for a value type to inform decision-making: institutional norms (who has authority and accountability, and how mandates are allocated), procedural norms (the decision pathways through which values are considered, contested, monitored, and revised), and substantive norms (the enforceable duties, standards, prohibitions, and rights that apply). The tables list each provision, its assigned value type, and its primary feasibility function, providing the full basis for Figure 2 and for our assessment of whether each value orientation is viable, partial, or absent across the analysed instruments.

**Table 1: Institutional Norms**

| **Instrument** | **Typology** | **Provision** | **Category justification (1–2 sentences)** |
| --- | --- | --- | --- |
| **United Kingdom** | | | |
| WFD 2017 | Living from nature | Reg. 2(1) | Defines the scope of water services and the governance architecture for economic utility management. |
| EA 2021 | Living in nature | Sec. 1(1)(b) | Allocates responsibilities and powers to the Secretary of State to set specific environmental targets. |
| EA 2021 | Living with nature | Sec. 89(1) | Allocates the power and mandate to a governing body to establish mandatory ecological standards. |
| EA 2021 | Living with nature | Sec. 90 | Allocates institutional authority and regulatory competence specifically to the Welsh Ministers. |
| EA 2021 | Living with nature | Sec. 91 | Allocates institutional authority and regulatory competence to the Northern Ireland Department. |
| EA 2021 | Living from nature | Sec. 94 & 95 | Allocates powers to regulatory bodies to define the architecture of financial governance for drainage rates. |
| **Mexico** | | | |
| LGA | Art. 25, II | Living with nature | Allocates responsibilities and powers to the Federation to undertake specific ecological restoration actions. |
| LGA | Art. 27, III | Living from nature | Allocates responsibilities and regulatory competences to the State regarding water service provision and reuse. |
| LGA | Art. 44 | Living from nature | Defines the mandate and governs the institutional functions of water operators. |

**Table 2: Procedural Norms**

| **Instrument** | **Typology** | **Provision** | **Justification** |
| --- | --- | --- | --- |
| **United Kingdom** | | | |
| WFD 2017 | Living from nature | Reg. 7(1); 21(1)(b) | Mandates economic analysis and planning processes as part of the cost-recovery decision-making cycle. |
| WFD 2017 | Living in nature | Reg. 10(2)(b)(ii) | Establishes a reporting and transparency obligation via the maintenance of a register for recreational waters. |
| WFD 2017 | Living from nature | Reg. 20(2)(e) | Regulates permitting and approval steps through mandatory registers and authorisations for resource abstraction. |
| EA 2021 | Living from nature | Sec. 78(2); (5); (7) | Mandates specific planning processes and cycles for water resources and drought management. |
| EA 2021 | Living from nature | Sec. 78(7) (Insert 39F(2)) | Establishes a reporting and transparency obligation among licensees to improve supply efficiency. |
| EA 2021 | Living from nature | Sec. 79 (Insert 94A) | Mandates the procedural steps and planning cycles for drainage and sewerage management. |
| EA 2021 | Living in nature | Sec. 81 (Insert 141DA) | Imposes a transparency and real-time reporting obligation regarding storm overflow discharges. |
| EA 2021 | Living with nature | Sec. 82 (Insert 141DB) | Creates a mandatory duty to monitor and report on the status of water bodies. |
| EA 2021 | Living from nature | Sec. 97 | Establishes a procedural mechanism for the disclosure of information necessary for land drainage calculations. |
| **Mexico** | | | |
| LGA | Art. 31, XIV | Living with nature | Sets the material content for the National Strategy planning and review cycles. |
| LGA | Art. 35, c) | Living with nature | Establishes objectives for research and monitoring to assess the status of water bodies. |

**Table 3: Substantive Norms**

| **Instrument** | **Typology** | **Provision** | **Justification** |
| --- | --- | --- | --- |
| **United Kingdom** | | | |
| WFD 2017 | Living from nature | Reg. 8(1)(a) | Sets a material standard for identifying protected areas based on human consumption thresholds. |
| WFD 2017 | Living from nature | Reg. 9(2); 10(2)(b)(i) | Sets a substantive outcome/rule for the protection of specific shellfish production areas. |
| WFD 2017 | Living from nature | Reg. 15(3)(a)(iii)-(iv) | Establishes a prioritisation rule allowing modifications for high-value economic activities. |
| WFD 2017 | Living from nature | Reg. 20(2)(c); 21(1)(a) | Sets economic standards and rules for water pricing to achieve resource efficiency outcomes. |
| WFD 2017 | Living from nature | Reg. 20(2)(j)(i) | Establishes a clear permission/rule regarding water injection for industrial extraction. |
| WFD 2017 | Living with nature | Reg. 3(2)(a) | Imposes a fundamental duty and prohibition against the deterioration of water status. |
| WFD 2017 | Living with nature | Reg. 13(2)(a) | Establishes mandatory ecological standards and outcomes for surface water restoration. |
| WFD 2017 | Living with nature | Reg. 13(4) | Sets substantive standards and status requirements for groundwater quality and volume. |
| WFD 2017 | Living with nature | Reg. 20(2)(i) | Sets a duty to ensure hydromorphological conditions meet specific ecological standards. |
| WFD 2017 | Living in nature | Sch. 1, para. 1(2) | Defines pollution as a substantive prohibition based on interference with human amenity. |
| WFD 2017 | Living with nature | Sch. 1, Def "Ecological Status" | Sets a concrete environmental standard for assessing ecosystem structure and function. |
| WFD 2017 | Living with nature | Sch. 1, Def "Pollution" | Establishes a material prohibition against substances harmful to dependent ecosystems. |
| WFD 2017 | Living in nature | Sch. 5, para 13(a)(i) | Enforces material standards and quality parameters for bathing water safety. |
| EA 2021 | Living from nature | Sec. 1(3)(d) | Sets a mandatory goal and standard for resource efficiency and waste reduction. |
| EA 2021 | Living with nature | Sec. 1(3)(c) | Sets a mandatory goal and standard for conserving and enhancing biodiversity. |
| EA 2021 | Living with nature | Sec. 17(5) | Establishes foundational principles of precaution and prevention with operative legal consequences. |
| EA 2021 | Living with nature | Sec. 44 | Defines the material scope and content of the natural environment subject to protection. |
| EA 2021 | Living with nature | Sec. 45(c) | Establishes a material duty and outcome for the maintenance and restoration of nature. |
| EA 2021 | Living in nature | Sec. 57(3)(b) & 58(1) [WIA 1991] | Imposes a clear duty and obligation to reduce adverse impacts on public health. |
| EA 2021 | Living with nature | Sec. 61ZA(1) | Establishes a rule for prioritising environmental protection via license revocation. |
| EA 2021 | Living with nature | Sec. 67(4) | Defines the material scope and interdependent duties of protection for the water environment. |
| EA 2021 | Living with nature | Sec. 83 (Insert 141DC) | Imposes a continuous duty and standard to progressively reduce ecological impacts. |
| EA 2021 | Living from nature | Sec. 88 (Insert 61ZA(3); 61ZB(3)) | Sets a specific rule/condition regarding financial rights and efficiency performance. |
| EA 2021 | Living with nature | Sec. 93 | Sets material definitions and standards necessary for water quality enforcement. |
| EA 2021 | Living from nature | Sec. 101(1); (5) | Creates an economic mechanism and material rights through biodiversity credits. |
| EA 2021 | Living in nature | Sec. 125(1)(b) | Defines a substantive protection standard based on cultural and historic interest. |
| **Mexico** | | | |
| LGA | Art. 1 | Living in nature | Establishes a fundamental right and foundational principle for water governance. |
| LGA | Art. 3, V | Living in nature | Imposes a duty and obligation on authorities to ensure equitable service outcomes. |
| LGA | Art. 4, V | Living in nature | Specifies the material standards and thresholds (salubrity, sufficiency) of a right. |
| LGA | Art. 4, XVI | Living with nature | Defines the material content and outcomes of nature-based restoration processes. |
| LGA | Art. 6, V | Living with nature | Establishes a foundational principle of prevention with operative legal consequences. |
| LGA | Art. 6, VI | Living with nature | Imposes a mandated precautionary duty and principle with operative consequences. |
| LGA | Art. 6, VIII | Living with nature | Defines the foundational principle and material goals of intergenerational equity and restoration. |
| LGA | Art. 7, IV | Living in nature | Sets an economic standard and rule for affordability thresholds. |
| LGA | Art. 9, Para 2 | Living in nature | Sets a mandatory rule and outcome for minimum volume provision. |
| LGA | Art. 13 | Living in nature | Imposes a substantive duty to achieve public health outcomes. |
| LGA | Art. 15, VI | Living in nature | Establishes a material right and a specific prioritisation rule. |
| LGA | Art. 23 | Living with nature | Imposes a promotional duty and obligation to achieve ecological restoration outcomes. |
| LGA | Art. 34 | Living in nature | Imposes a material duty on authorities to promote specific well-being outcomes. |
| LGA | Art. 36, VIII | Living with nature | Imposes a duty on authorities to foster an understanding of ecological status and harm. |
| LGA | Art. 41 | Living in nature | Sets a substantive prohibition and rule on the use and nature of service delivery. |
| LAN | Art. 1 | Living from nature | Sets the material scope and foundational objectives of the law. |
| LAN | Art. 3, VIII / XIII | Living from nature | Establishes the material rights and legal rules for resource allocation. |
| LAN | Art. 3, XVIII | Living from nature | Defines economic rules and financial duties regarding cost recovery. |
| LAN | Art. 3, LIV | Living with nature | Establishes a concrete environmental standard and flow threshold. |
| LAN | Art. 3, LVI | Living in nature | Establishes an allocation rule and priority for domestic use. |
| LAN | Art. 3, LVII | Living from nature | Establishes rules for use and definitions for mixed commercial activities. |
| LAN | Art. 4, Párrafo 2 | Living in nature | Establishes a material prioritisation rule for domestic consumption. |
| LAN | Art. 7, V | Living with nature | Establishes a foundational principle and priority rule for restoration. |
| LAN | Art. 14 BIS 5, X | Living with nature | Establishes a foundational principle of interdependence with operative consequences. |
| LAN | Art. 14 BIS 5, XI | Living from nature | Imposes an obligation on users and establishes economic rules for payment. |
| LAN | Art. 14 BIS 5, XV / XVI | Living from nature | Sets foundational economic principles (polluter-pays/user-pays) with material consequences. |
| LAN | Art. 14 BIS 5, XX | Living in nature | Imposes a material duty regarding educational and social participation outcomes. |
| LAN | Art. 29 BIS, III | Living with nature | Imposes a duty and obligation on users to remedy and pay for environmental harm [ polluter-pays; 15, 17]. |
| LAN | Art. 84 BIS | Living in nature | Imposes a material duty and promotional obligation on authorities. |
| LAN | Art. 123 BIS 4 | Living with nature | Establishes a substantive prohibition and sanction for altering ecological integrity (mixed). |
